# Supplementary material for: PTEN inhibits IL-2 receptor-mediated expansion of CD4+CD25+ Tregs
Source: JCI journal article supplement (doi:10.1172/jci28057), 2006-08-17
Supplement: sd1 [file 1]

Figure S1

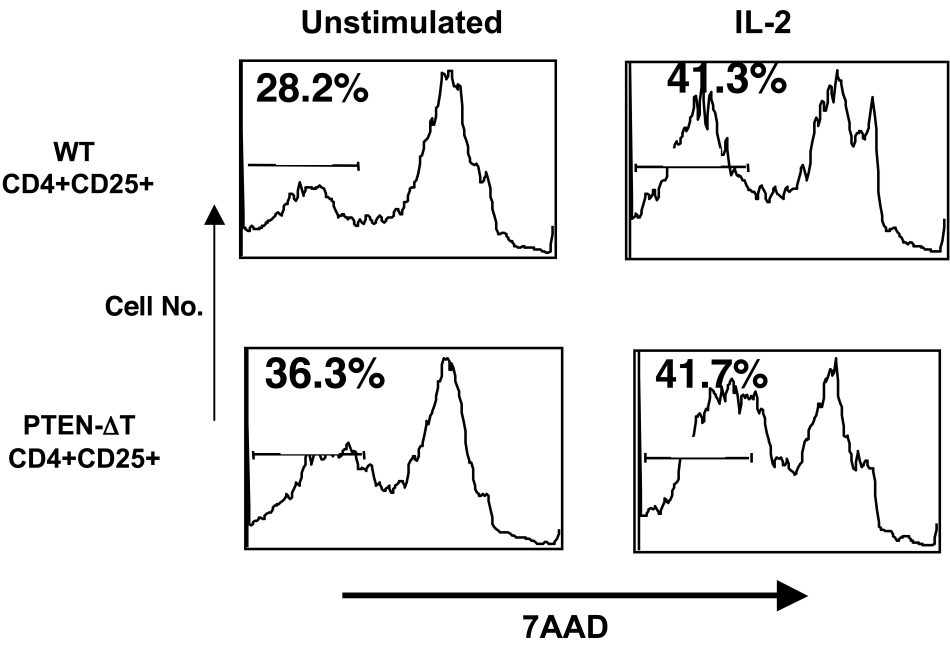

Figure S2

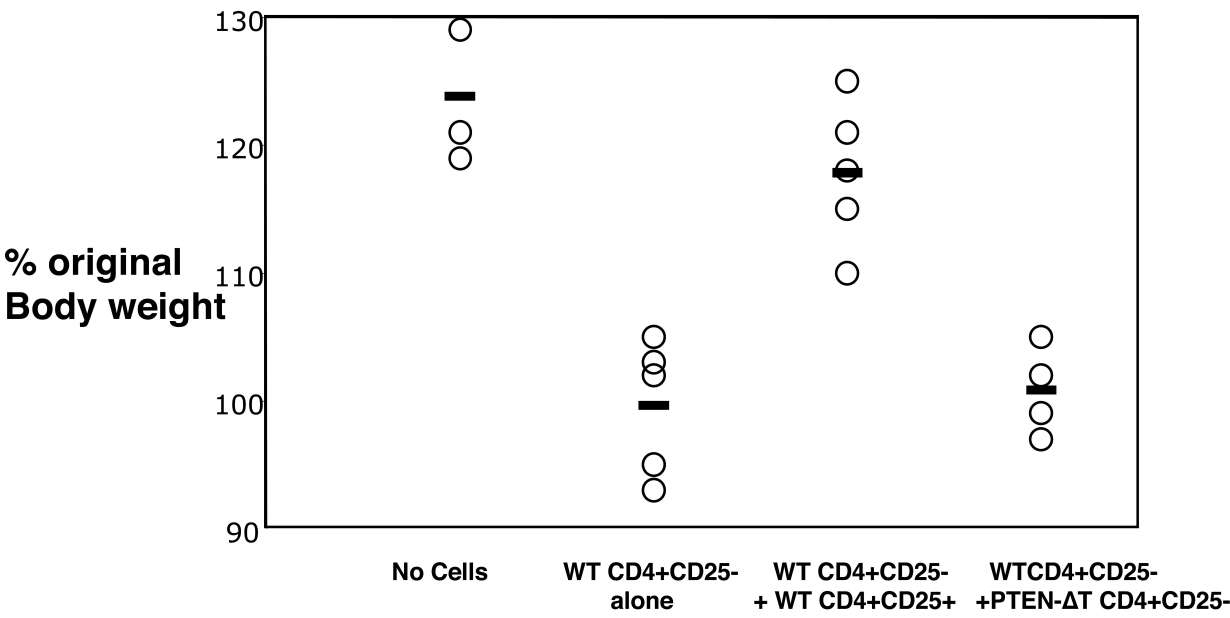

Supplementary Figure 1: PTEN deficiency does not affect IL-2 mediated survival of Tregs. Freshly isolated wild-type or PTEN-ΔT Tregs were cultured for 24 hours in the presence or absence of rIL-2 (100U/ml) and cell survival measured by staining with the vital dye 7-AAD followed by flow cytometric analysis.

Supplementary Figure 2: PTEN-ΔT CD4+CD25-CD45RB<sup>hi</sup> cells do not prevent colitis. Rag1<sup>-/-</sup> mice were transferred with 6x10<sup>6</sup> freshly isolated wild type CD4+CD25-CD45RB<sup>hi</sup> cells either alone (n=5) or together with 3x10<sup>6</sup> freshly isolated wild type Tregs (n=5) or PTEN-ΔT CD4+CD25-CD45RB<sup>hi</sup> cells (n=5, one mouse died during the examination period). Body weight is represented as percentage of initial weight 8 weeks after transfer.
